# Supplementary material for: Multi-Mechanistic In Vitro Evaluation of Antihyperglycemic, Antioxidant and Antiglycation Activities of Three Phenolic-Rich Indian Red Rice Genotypes and In Silico Evaluation of Their Phenolic Metabolites
Source: MDPI journal article supplement (doi:10.3390/foods10112818), 2021-11-16
Supplement: s1 [file s1]

## Supplementary Material

Title: Multi-mechanistic antihyperglycemic assessment of three Indian red rice cultivars: In silico, in vitro and in vivo analyses

**Table S1.** Morphological details of traditional experimental red rice varieties.

| Sample name | Sample code | Rice grains with bran                                                               | Bran % | Grain length (mm) | Grain breadth (mm) | Morphological * classification |
|-------------|-------------|-------------------------------------------------------------------------------------|--------|-------------------|--------------------|--------------------------------|
| Kattuyanam  | KA          |    | 13 %   | 5.0               | 2.0                | Short & Bold                   |
| Chennangi   | GS          |    | 10 %   | 4.0               | 2.0                | Short & Bold                   |
| Karungkuvai | KU          |  | 11 %   | 5.0               | 3.0                | Short & Round                  |

\* As per the Food and Agriculture Organization (FAO) of the United Nations, Rome, Italy.

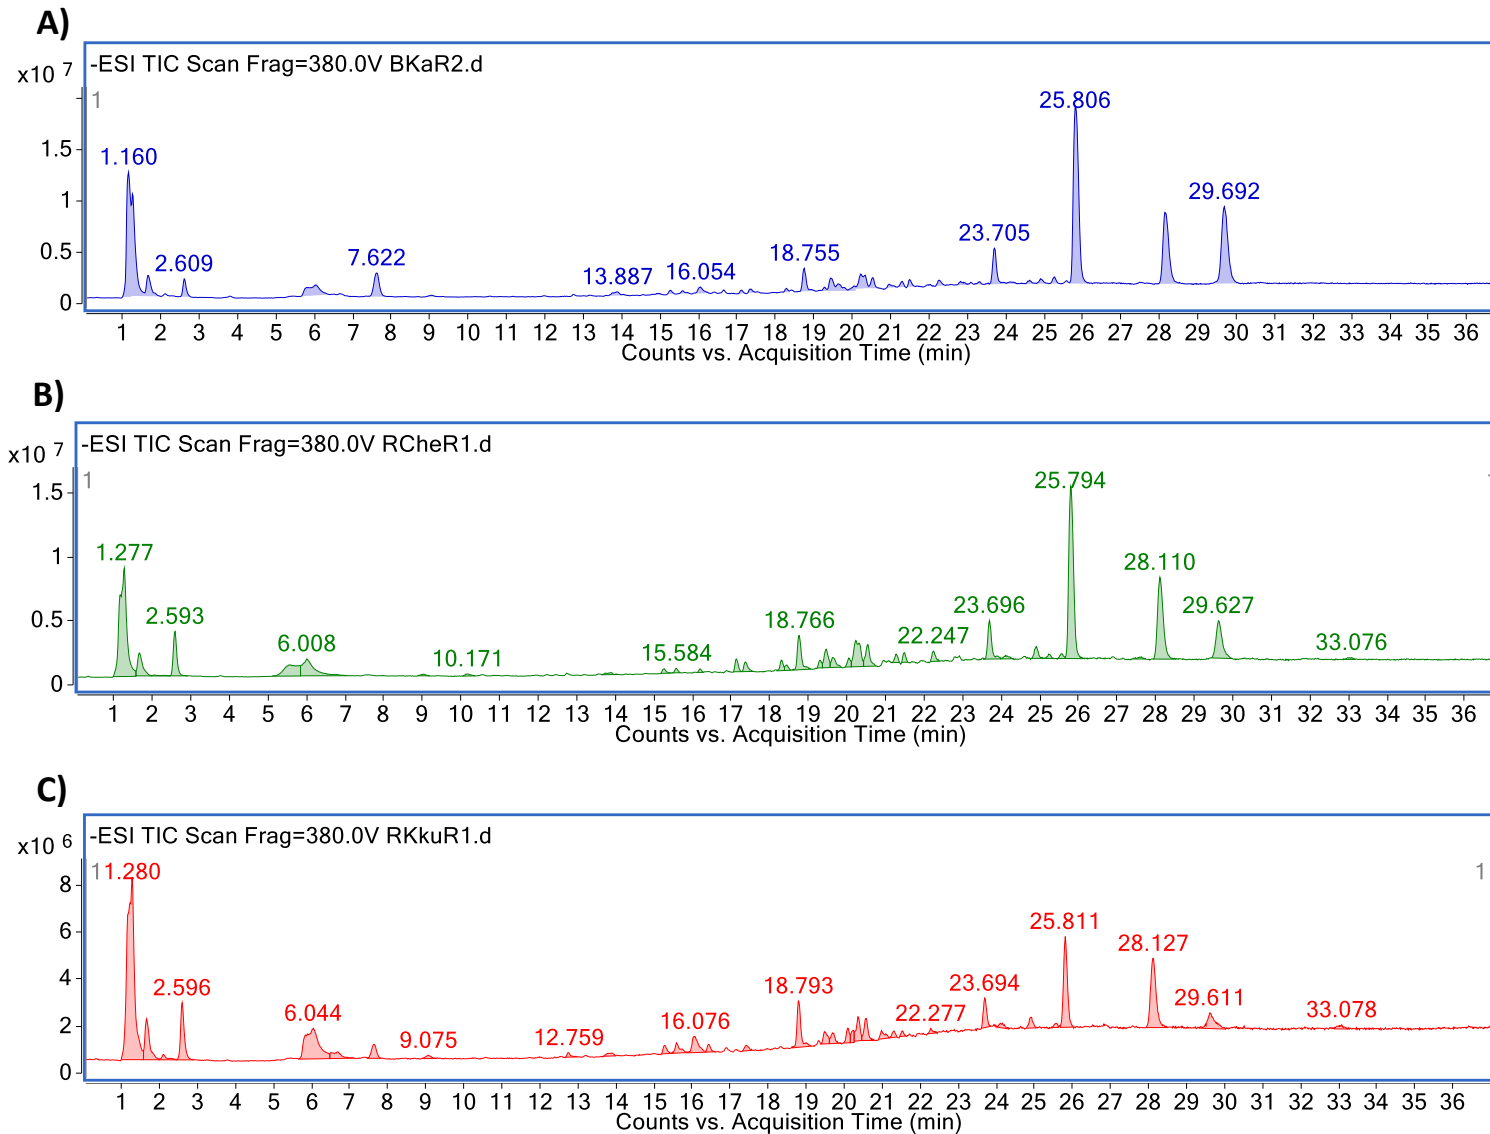

**Figure S1.** Total ion chromatograms of (A) Kattuyanam (B) Chennangi (C) Karungkuruvai.

**Table S2.** Retention time, m/z ratio, formula, diff, MS fragments and scores of the phenolic compounds identified in the experimental samples.

| S. No. | RT    | [M-H] <sup>-</sup><br>m/z | Formula                                         | Diff<br>(mDa) | Score | MS fragments                       | Compound                                               | Class             | Sub class                 |
|--------|-------|---------------------------|-------------------------------------------------|---------------|-------|------------------------------------|--------------------------------------------------------|-------------------|---------------------------|
| 1.     | 1.105 | 205.036                   | C <sub>7</sub> H <sub>10</sub> O <sub>7</sub>   | 1.94          | 85.72 | 125.0124                           | 2-methyl citric acid                                   | Other polyphenols |                           |
| 2.     | 1.147 | 479.11895                 | C <sub>22</sub> H <sub>23</sub> O <sub>12</sub> | 2.06          | 84.6  | 87.0076,123.0440                   | 4-O-Methyl delphinidin 3-O-D-glucoside                 | Flavonoids        | Anthocyanins              |
| 3.     | 1.152 | 271.0983                  | C <sub>16</sub> H <sub>16</sub> O <sub>4</sub>  | 0.55          | 85.67 | 225.0557                           | 3'-O-Methylequol                                       | Flavonoids        | Isoflavonoids             |
| 4.     | 1.155 | 480.4188                  | C <sub>22</sub> H <sub>24</sub> O <sub>12</sub> | -4.07         | 97.25 | 303.0874,<br>261.0768,<br>141.0557 | 3'-O-Methyl(-)-epicatechin 7-O-glucuronide             | Flavonoids        | Flavanols                 |
| 5.     | 1.169 | 304.2946                  | C <sub>16</sub> H <sub>16</sub> O <sub>6</sub>  | -0.86         | 94.45 | 149.0244,<br>123.0451,<br>111.0451 | 3'-O-Methylcatechin                                    | Flavonoids        | Flavanols                 |
| 6.     | 1.205 | 208.0674                  | C <sub>11</sub> H <sub>12</sub> O <sub>4</sub>  | -0.23         | 86.94 | 159.0446,<br>133.0289              | Sinapaldehyde                                          | Other polyphenols | Hydroxycinnamaldehydes    |
| 7.     | 1.222 | 637.1526                  | C <sub>29</sub> H <sub>32</sub> O <sub>16</sub> | 1.41          | 91.51 | 325.0348,<br>269.0449,<br>147.0293 | Kaempferol 3-O-(6''-acetyl-galactoside) 7-O-rhamnoside | Flavonoids        | Flavonols                 |
| 8.     | 1.231 | 435.0927                  | C <sub>20</sub> H <sub>19</sub> O <sub>11</sub> | 4.32          | 89.51 | 101.0238,<br>115.0395              | Delphinidin 3-O-arabinoside                            | Flavonoids        | Anthocyanins              |
| 9.     | 1.233 | 145.0501                  | C <sub>9</sub> H <sub>6</sub> O <sub>2</sub>    | -0.36         | 86.48 | 129.045                            | Coumarin                                               | Phenolic acids    | Hydroxycinnamic acids     |
| 10.    | 1.238 | 306.0726                  | C <sub>15</sub> H <sub>14</sub> O <sub>7</sub>  | 1.24          | 87.27 | 286.0452,<br>260.0663              | Epigallocatechin                                       | Flavonoids        | Flavanols                 |
| 11.    | 1.282 | 419.09782                 | C <sub>20</sub> H <sub>19</sub> O <sub>10</sub> | -8.51         | 87.45 | 101.0238,<br>129.0551              | Cyanidin 3-O-arabinoside                               | Flavonoids        | Anthocyanins              |
| 12.    | 1.355 | 134.0143                  | C <sub>4</sub> H <sub>6</sub> O <sub>5</sub>    | 0.02          | 98.93 | 84.9926                            | Malic acid                                             | Flavonoids        | Flavonols                 |
| 13.    | 1.705 | 124.1372                  | C <sub>7</sub> H <sub>8</sub> O <sub>2</sub>    | -0.68         | 87.23 | 123.0446, 65.0027                  | 3-Methylcatechol                                       | Other polyphenols | Alkylphenols              |
| 14.    | 1.771 | 167.0342                  | C <sub>8</sub> H <sub>8</sub> O <sub>4</sub>    | -0.67         | 85.07 | 168.0376,<br>125.0231              | 3,4-Dihydroxyphenylacetic acid                         | Phenolic acids    | Hydroxyphenylacetic acids |

|     |       |          |                                                 |       |       |                                    |                                                |                          |                               |
|-----|-------|----------|-------------------------------------------------|-------|-------|------------------------------------|------------------------------------------------|--------------------------|-------------------------------|
| 15. | 1.788 | 167.0334 | C <sub>8</sub> H <sub>8</sub> O <sub>4</sub>    | -1.37 | 82.26 | 479.0909,<br>357.0583              | <i>Vanillic acid</i>                           | <i>Phenolic acids</i>    | <i>Hydroxybenzoic acids</i>   |
| 16. | 1.822 | 197.0446 | C <sub>9</sub> H <sub>10</sub> O <sub>5</sub>   | -0.59 | 97.71 | 166.9980,<br>108.9925, 80.9976     | <i>Ethyl Gallate</i>                           | <i>Phenolic acids</i>    | <i>Hydroxybenzoic acids</i>   |
| 17. | 1.855 | 179.0337 | C <sub>9</sub> H <sub>8</sub> O <sub>4</sub>    | -1.26 | 84.57 | 181.0438,<br>145.0244              | <i>Caffeic acid</i>                            | <i>Phenolic acids</i>    | <i>Hydroxycinnamic acids</i>  |
| 18. | 1.922 | 191.019  | C <sub>6</sub> H <sub>8</sub> O <sub>7</sub>    | -0.78 | 90.56 | 111.121                            | <i>Citric acid</i>                             |                          |                               |
| 19. | 2.105 | 169.0133 | C <sub>7</sub> H <sub>6</sub> O <sub>5</sub>    | -0.97 | 93.34 | 169.0218,<br>126.0337,<br>124.0225 | <i>Gallic acid</i>                             | <i>Phenolic acids</i>    | <i>Hydroxybenzoic acids</i>   |
| 20. | 2.138 | 163.0394 | C <sub>9</sub> H <sub>8</sub> O <sub>3</sub>    | -0.57 | 97.65 | 163.0395,<br>119.3241, 93.0354     | <i>p-Coumaric acid</i>                         | <i>Phenolic acids</i>    | <i>Hydroxycinnamic acids</i>  |
| 21. | 2.455 | 449.1087 | C <sub>21</sub> H <sub>22</sub> O <sub>11</sub> | -0.13 | 80.51 | 285.0399,<br>149.0238,<br>107.0133 | <i>Eriodictyol 7-O-glucoside</i>               | <i>Flavonoids</i>        | <i>Flavanones</i>             |
| 22. | 3.005 | 343.1078 | C <sub>19</sub> H <sub>18</sub> O <sub>6</sub>  | -0.99 | 91.17 | 285.0762,<br>199.0395              | <i>Tetramethylscutellarein</i>                 | <i>Flavonoids</i>        | <i>Flavones</i>               |
| 23. | 3.215 | 178.0629 | C <sub>10</sub> H <sub>12</sub> O <sub>3</sub>  | 0.33  | 84.63 | 123.0446, 79.0183                  | <i>Ferulaldehyde</i>                           | <i>Other polyphenols</i> | <i>Hydroxycinnamaldehydes</i> |
| 24. | 3.805 | 138.0234 | C <sub>7</sub> H <sub>6</sub> O <sub>3</sub>    | -1    | 91.13 | 137.0239, 93.0341                  | <i>p-Hydroxybenzoic acid</i>                   | <i>Phenolic acids</i>    | <i>Hydroxybenzoic acids</i>   |
| 25. | 4.005 | 178.0508 | C <sub>9</sub> H <sub>9</sub> NO <sub>3</sub>   | -0.17 | 93.02 | 178.0499,<br>134.0943              | <i>Hippuric acid</i>                           | <i>Phenolic acids</i>    | <i>Hydroxybenzoic acids</i>   |
| 26. | 4.272 | 367.1038 | C <sub>17</sub> H <sub>20</sub> O <sub>9</sub>  | 0.29  | 87.43 | 173.0449,<br>143.0344, 59.0133     | <i>Feruloylquinic acid</i>                     | <i>Phenolic acids</i>    | <i>Hydroxycinnamic acids</i>  |
| 27. | 4.555 | 193.0502 | C <sub>10</sub> H <sub>10</sub> O <sub>4</sub>  | -0.72 | 84.6  | 147.0451,<br>119.0502              | <i>Ferulic acid</i>                            | <i>Phenolic acids</i>    | <i>Hydroxycinnamic acids</i>  |
| 28. | 5.089 | 195.0286 | C <sub>9</sub> H <sub>8</sub> O <sub>5</sub>    | -1.27 | 90.82 | 147.0082,<br>121.0289,<br>107.0133 | <i>Hydroxycaffeic acid</i>                     | <i>Phenolic acids</i>    | <i>Hydroxycinnamic acids</i>  |
| 29. | 5.414 | 389.1227 | C <sub>18</sub> H <sub>18</sub> O <sub>6</sub>  | -1.45 | 92.83 | 243.0662                           | <i>3'-O-Methylviolanone</i>                    | <i>Flavonoids</i>        | <i>Isoflavonoids</i>          |
| 30. | 6.044 | 595.1451 | C <sub>30</sub> H <sub>27</sub> O <sub>13</sub> | -2.12 | 85.24 | 83.0133, 125.0966                  | <i>Cyanidin 3-O-(6"-p-coumaroyl-glucoside)</i> | <i>Flavonoids</i>        | <i>Anthocyanins</i>           |
| 31. | 6.289 | 153.0192 | C <sub>7</sub> H <sub>6</sub> O <sub>4</sub>    | -0.14 | 99.64 | 108.9925,<br>84.9925, 68.9976      | <i>2,4-Dihydroxybenzoic acid</i>               | <i>Phenolic acids</i>    | <i>Hydroxybenzoic acids</i>   |

|     |       |          |                                                 |       |       |                                                 |                                           |                          |                                     |
|-----|-------|----------|-------------------------------------------------|-------|-------|-------------------------------------------------|-------------------------------------------|--------------------------|-------------------------------------|
| 32. | 6.289 | 577.1352 | C <sub>30</sub> H <sub>26</sub> O <sub>12</sub> | 0     | 90.2  | 578.1407,<br>425.0862                           | <i>Procyanidin dimer B1</i>               | <i>Flavonoids</i>        | <i>Anthocyanins</i>                 |
| 33. | 6.325 | 595.1663 | C <sub>27</sub> H <sub>31</sub> O <sub>15</sub> | 1.23  | 88.06 | 105.0334,<br>147.0651                           | <i>Pelargonidin 3-O-sophoroside</i>       | <i>Flavonoids</i>        | <i>Anthocyanins</i>                 |
| 34. | 6.455 | 165.0557 | C <sub>9</sub> H <sub>10</sub> O <sub>3</sub>   | -0.04 | 87.61 | 111.4031, 83.1211                               | <i>Dihydro-p-coumaric acid</i>            | <i>Phenolic acids</i>    | <i>Hydroxyphenylpropanoic acids</i> |
| 35. | 6.465 | 315.1135 | C <sub>15</sub> H <sub>18</sub> O <sub>8</sub>  | -0.56 | 90.23 | 147.0293,<br>119.0344, 55.0183                  | <i>1-O-p-Coumaroyl-beta-D-glucose</i>     | <i>Phenolic acids</i>    | <i>Hydroxycinnamic acids</i>        |
| 36. | 6.539 | 347.0919 | C <sub>15</sub> H <sub>18</sub> O <sub>9</sub>  | -1.47 | 90.88 | 149.0238,<br>121.0289, 71.0133                  | <i>Caffeic acid 4-O-glucoside</i>         | <i>Phenolic acids</i>    | <i>Hydroxycinnamic acids</i>        |
| 37. | 6.601 | 355.0652 | C <sub>15</sub> H <sub>16</sub> O <sub>10</sub> | -1.82 | 90.3  | 161.0244,<br>121.0295                           | <i>Caffeic acid 3-O-glucuronide</i>       | <i>Phenolic acids</i>    | <i>Hydroxycinnamic acids</i>        |
| 38. | 6.672 | 289.0703 | C <sub>15</sub> H <sub>14</sub> O <sub>6</sub>  | -1.5  | 92.29 | 289.0712,<br>187.0411,<br>123.0456              | <i>Catechin</i>                           | <i>Flavonoids</i>        | <i>Flavanols</i>                    |
| 39. | 7.272 | 288.2522 | C <sub>15</sub> H <sub>12</sub> O <sub>6</sub>  | 0.41  | 89.43 | 179.0344,<br>161.0238,<br>135.0446,<br>121.0289 | <i>3',4',5,7-Tetrahydroxyisoflavanone</i> | <i>Flavonoids</i>        | <i>Isoflavonoids</i>                |
| 40. | 7.372 | 274.2367 | C <sub>15</sub> H <sub>14</sub> O <sub>5</sub>  | -0.68 | 93.94 | 217.087,<br>161.0608,<br>125.0244               | <i>3'-Hydroxy-O-desmethylan-golensin</i>  | <i>Flavonoids</i>        | <i>Isoflavonoids</i>                |
| 41. | 7.572 | 286.1252 | C <sub>15</sub> H <sub>10</sub> O <sub>6</sub>  | 0.25  | 92.72 | 201.0193,<br>149.0244                           | <i>3'-Hydroxygenistein</i>                | <i>Flavonoids</i>        | <i>Isoflavonoids</i>                |
| 42. | 7.584 | 121.0289 | C <sub>7</sub> H <sub>6</sub> O <sub>2</sub>    | -0.61 | 97.34 | 92.2042, 64.9181                                | <i>Benzoic acid</i>                       | <i>Phenolic acids</i>    | <i>Hydroxybenzoic acids</i>         |
| 43. | 7.605 | 121.0289 | C <sub>7</sub> H <sub>6</sub> O <sub>2</sub>    | -0.64 | 97.09 | 121.0294,<br>108.0218, 93.0345                  | <i>4-Hydroxybenzaldehyde</i>              | <i>Other polyphenols</i> | <i>Hydroxybenzaldehydes</i>         |
| 44. | 7.672 | 195.0649 | C <sub>10</sub> H <sub>12</sub> O <sub>4</sub>  | -1.41 | 90.72 | 151.0759,<br>149.0238,<br>121.0653              | <i>Dihydroferulic acid</i>                | <i>Phenolic acids</i>    | <i>Hydroxyphenylpropanoic acids</i> |
| 45. | 7.739 | 465.1024 | C <sub>21</sub> H <sub>22</sub> O <sub>12</sub> | -1.41 | 90.93 | 289.0353,<br>261.0404,<br>165.0193              | <i>Dihydromyricetin 3-O-rhamnoside</i>    | <i>Flavonoids</i>        | <i>Dihydroflavonols</i>             |
| 46. | 8.889 | 563.1408 | C <sub>26</sub> H <sub>28</sub> O <sub>14</sub> | 0.12  | 99.52 | 383.2032                                        | <i>Apigenin-6-C-pentosyl-8-C-hexoside</i> | <i>Flavonoids</i>        | <i>Flavones</i>                     |

|     |        |           |                                                 |       |       |                                             |                                                  |                          |                              |
|-----|--------|-----------|-------------------------------------------------|-------|-------|---------------------------------------------|--------------------------------------------------|--------------------------|------------------------------|
| 47. | 9.389  | 434.397   | C <sub>21</sub> H <sub>22</sub> O <sub>10</sub> | 1.03  | 77.66 | 255.0657,<br>135.0446, 89.0238              | <i>Naringin 4'-glucoside</i>                     | <i>Flavonoids</i>        | <i>Flavanones</i>            |
| 48. | 9.422  | 447.0941  | C <sub>21</sub> H <sub>20</sub> O <sub>11</sub> | 0.84  | 98.04 | 283.0242,<br>201.0187,<br>109.0289, 71.0133 | <i>6-Hydroxyluteolin 7-O-rhamnoside</i>          | <i>Flavonoids</i>        | <i>Flavones</i>              |
| 49. | 9.789  | 595.1669  | C <sub>27</sub> H <sub>32</sub> O <sub>15</sub> | 0.25  | 89.67 | 287.0555,<br>135.0082                       | <i>Eriocitrin</i>                                | <i>Flavonoids</i>        | <i>Flavanones</i>            |
| 50. | 10.122 | 303.0517  | C <sub>15</sub> H <sub>12</sub> O <sub>7</sub>  | 0.6   | 98.41 | 229.0492,<br>178.9978                       | <i>Dihydroquercetin</i>                          | <i>Flavonoids</i>        | <i>Dihydroflavonols</i>      |
| 51. | 10.406 | 611.1476  | C <sub>27</sub> H <sub>31</sub> O <sub>16</sub> | 1.55  | 95.06 | 177.0399,<br>131.0344                       | <i>Cyanidin 3-O-sophoroside</i>                  | <i>Flavonoids</i>        | <i>Anthocyanins</i>          |
| 52. | 10.567 | 431.0992  | C <sub>21</sub> H <sub>20</sub> O <sub>10</sub> | 0.6   | 76.39 | 385.0923                                    | <i>3-Methoxynobiletin</i>                        | <i>Flavonoids</i>        | <i>Flavonols</i>             |
| 53. | 10.575 | 433.11347 | C <sub>21</sub> H <sub>21</sub> O <sub>10</sub> | -3.52 | 89.94 | 121.0284,<br>137.0233                       | <i>Isopeonidin 3-O-arabinoside</i>               | <i>Flavonoids</i>        | <i>Anthocyanins</i>          |
| 54. | 10.806 | 463.0892  | C <sub>21</sub> H <sub>20</sub> O <sub>12</sub> | 0.93  | 97.43 | 301.0388,<br>243.0328                       | <i>Isoquercetin</i>                              | <i>Flavonoids</i>        | <i>Flavonols</i>             |
| 55. | 10.833 | 482.1004  | C <sub>21</sub> H <sub>22</sub> O <sub>13</sub> | 0.27  | 98.76 | 263.0561,<br>137.0244,<br>109.0295          | <i>Epigallocatechin 3'-O-glucuronide</i>         | <i>Flavonoids</i>        | <i>Flavanols</i>             |
| 56. | 10.906 | 177.0197  | C <sub>9</sub> H <sub>6</sub> O <sub>4</sub>    | 0.42  | 93.19 | 133.0213,<br>105.1213, 89.4351              | <i>Esculetin</i>                                 | <i>Other polyphenols</i> | <i>Hydroxycoumarins</i>      |
| 57. | 11.123 | 740.2155  | C <sub>33</sub> H <sub>40</sub> O <sub>19</sub> | 1.03  | 83.97 | 283.0242,<br>219.086, 135.0082              | <i>Kaempferol 3-O-xylosyl-rutinoside</i>         | <i>Flavonoids</i>        | <i>Flavonols</i>             |
| 58. | 11.175 | 403.10291 | C <sub>20</sub> H <sub>19</sub> O <sub>9</sub>  | -3.47 | 88.25 | 99.0082, 113.0238                           | <i>Pelargonidin 3-O-arabinoside</i>              | <i>Flavonoids</i>        | <i>Anthocyanins</i>          |
| 59. | 11.356 | 258.0892  | C <sub>15</sub> H <sub>14</sub> O <sub>4</sub>  | 2.38  | 93.15 | 119.0502,<br>109.0295,<br>93.0345, 77.0396  | <i>3',4',7-Trihydroxyisoflavan</i>               | <i>Flavonoids</i>        | <i>Isoflavonoids</i>         |
| 60. | 11.506 | 147.0453  | C <sub>9</sub> H <sub>8</sub> O <sub>2</sub>    | 0.08  | 99.53 | 147.0446,<br>145.8880,<br>102.9346          | <i>Cinnamic acid</i>                             | <i>Phenolic acids</i>    | <i>Hydroxycinnamic acids</i> |
| 61. | 11.806 | 624.1627  | C <sub>28</sub> H <sub>32</sub> O <sub>16</sub> | 0.97  | 97.42 | 357.0621,<br>163.0606                       | <i>Isorhamnetin 3-O-glucoside 7-O-rhamnoside</i> | <i>Flavonoids</i>        | <i>Flavonols</i>             |
| 62. | 12.189 | 432.1043  | C <sub>21</sub> H <sub>20</sub> O <sub>10</sub> | 0.45  | 98.95 | 323.0563,<br>284.0662                       | <i>Apigenin 6-C-glucoside</i>                    | <i>Flavonoids</i>        | <i>Flavones</i>              |

|     |        |           |                                                 |       |       |                                               |                                                 |                          |                                  |
|-----|--------|-----------|-------------------------------------------------|-------|-------|-----------------------------------------------|-------------------------------------------------|--------------------------|----------------------------------|
| 63. | 12.189 | 477.1043  | C <sub>22</sub> H <sub>22</sub> O <sub>12</sub> | 0.45  | 98.95 | 151.0036,<br>109.0295                         | <i>Hesperetin 3'-O-glucuronide</i>              | <i>Flavonoids</i>        | <i>Flavanones</i>                |
| 64. | 12.199 | 450.1039  | C <sub>21</sub> H <sub>22</sub> O <sub>11</sub> | 0.41  | 99.51 | 285.0421,<br>175.0575,<br>125.0263            | <i>Dihydroquercetin 3-O-rhamnoside</i>          | <i>Flavonoids</i>        | <i>Dihydroflavonols</i>          |
| 65. | 12.324 | 597.1455  | C <sub>26</sub> H <sub>29</sub> O <sub>16</sub> | 0.57  | 86.28 | 87.0082, 117.0187                             | <i>Delphinidin 3-O-sambubioside</i>             | <i>Flavonoids</i>        | <i>Anthocyanins</i>              |
| 66. | 12.439 | 258.2591  | C <sub>15</sub> H <sub>12</sub> O <sub>5</sub>  | 0.18  | 98.1  | 163.04, 145.0295                              | <i>3',4',7-Trihydroxyisoflavanone</i>           | <i>Flavonoids</i>        | <i>Isoflavonoids</i>             |
| 67. | 12.506 | 178.0556  | C <sub>10</sub> H <sub>10</sub> O <sub>3</sub>  | -0.26 | 96.87 | 133.06533,<br>115.0547, 91.0547               | <i>Mellein</i>                                  | <i>Other polyphenols</i> | <i>Hydroxycoumarins</i>          |
| 68. | 12.748 | 609.181   | C <sub>28</sub> H <sub>34</sub> O <sub>15</sub> | -1.15 | 91.61 | 260.0623,<br>224.0495,<br>150.0315            | <i>Hesperidin</i>                               | <i>Flavonoids</i>        | <i>Flavanones</i>                |
| 69. | 12.856 | 151.04    | C <sub>8</sub> H <sub>8</sub> O <sub>3</sub>    | -0.08 | 87    | 151.0395,<br>107.0497                         | <i>2-Hydroxyphenylacetic acid</i>               | <i>Phenolic acids</i>    | <i>Hydroxyphenylacetic acids</i> |
| 70. | 13.198 | 318.0295  | C <sub>15</sub> H <sub>10</sub> O <sub>8</sub>  | -0.77 | 82.96 | 165.0496,<br>151.9063                         | <i>Myricetin</i>                                | <i>Flavonoids</i>        | <i>Flavonols</i>                 |
| 71. | 13.434 | 602.4335  | C <sub>40</sub> H <sub>58</sub> O <sub>4</sub>  | 1.21  | 89.67 | 177.0187,<br>313.2531                         | <i>Gamma oryzanol</i>                           | <i>Phenolic acids</i>    | <i>Hydroxycinnamic acids</i>     |
| 72. | 14.32  | 609.1608  | C <sub>31</sub> H <sub>29</sub> O <sub>13</sub> | 1.11  | 88.7  | 103.0395,<br>129.0551                         | <i>Peonidin 3-O-(6''-p-coumaroyl-glucoside)</i> | <i>Flavonoids</i>        | <i>Anthocyanins</i>              |
| 73. | 14.84  | 301.0357  | C <sub>15</sub> H <sub>10</sub> O <sub>7</sub>  | 0.29  | 85.24 | 166.9980,<br>123.0082                         | <i>6-Hydroxyluteolin</i>                        | <i>Flavonoids</i>        | <i>Flavones</i>                  |
| 74. | 14.942 | 402.3946  | C <sub>22</sub> H <sub>24</sub> O <sub>9</sub>  | -0.99 | 90.06 | 386.1247,<br>284.0833                         | <i>3-Methoxysinensetin</i>                      | <i>Flavonoids</i>        | <i>Flavonols</i>                 |
| 75. | 14.942 | 358.1052  | C <sub>19</sub> H <sub>18</sub> O <sub>7</sub>  | -2.99 | 80.06 | 327.0868,<br>243.0293                         | <i>Gardenin B</i>                               | <i>Flavonoids</i>        | <i>Flavones</i>                  |
| 76. | 14.973 | 136.0508  | C <sub>8</sub> H <sub>8</sub> O <sub>2</sub>    | -0.01 | 86.28 | 136.04763,<br>134.89358,<br>108.0204, 92.0492 | <i>Phenylacetic acid</i>                        | <i>Phenolic acids</i>    | <i>Hydroxyphenylacetic acids</i> |
| 77. | 15.273 | 151.0755  | C <sub>9</sub> H <sub>12</sub> O <sub>2</sub>   | -0.94 | 82.67 | 121.0653, 89.0391                             | <i>4-Ethylguaiaicol</i>                         | <i>Other polyphenols</i> | <i>Alkylmethoxyphenols</i>       |
| 78. | 15.35  | 611.1612  | C <sub>27</sub> H <sub>31</sub> O <sub>16</sub> | 0.65  | 88.93 | 103.0395,<br>131.0344                         | <i>Cyanidin 3,5-O-diglucoside</i>               | <i>Flavonoids</i>        | <i>Anthocyanins</i>              |
| 79. | 15.47  | 609.18195 | C <sub>28</sub> H <sub>33</sub> O <sub>15</sub> | 0.27  | 88.19 | 87.0446, 103.0395                             | <i>Peonidin 3-O-rutinoside</i>                  | <i>Flavonoids</i>        | <i>Anthocyanins</i>              |

|     |        |          |                                                 |       |       |                                                 |                                              |            |               |
|-----|--------|----------|-------------------------------------------------|-------|-------|-------------------------------------------------|----------------------------------------------|------------|---------------|
| 80. | 15.508 | 271.06   | C <sub>16</sub> H <sub>16</sub> O <sub>4</sub>  | -1.28 | 93.68 | 225.0551,<br>123.0451                           | 4',7-Dihydroxy-3'-methoxyisoflavan           | Flavonoids | Isoflavonoids |
| 81. | 15.723 | 269.0459 | C <sub>15</sub> H <sub>10</sub> O <sub>5</sub>  | 0.38  | 99.29 | 224.0496,<br>135.0076,<br>119.0129              | 3',4',7-Trihydroxyisoflavone                 | Flavonoids | Isoflavonoids |
| 82. | 15.746 | 471.9983 | C <sub>23</sub> H <sub>20</sub> O <sub>11</sub> | -2    | 70.7  | 287.0561,<br>123.0451                           | 4''-O-Methylepigallocatechin 3-O-gallate     | Flavonoids | Flavanols     |
| 83. | 15.79  | 301.0718 | C <sub>16</sub> H <sub>14</sub> O <sub>6</sub>  | 0.08  | 99.19 | 243.0297,<br>196.0011,<br>151.0042              | Hesperetin                                   | Flavonoids | Flavanones    |
| 84. | 15.79  | 256.0718 | C <sub>15</sub> H <sub>12</sub> O <sub>4</sub>  | 0.08  | 99.19 | 213.0554,<br>151.0037                           | Pinocembrin                                  | Flavonoids | Flavanones    |
| 85. | 16.023 | 329.0673 | C <sub>17</sub> H <sub>14</sub> O <sub>7</sub>  | 0.62  | 98.55 | 271.0242,<br>147.0082                           | 3,7-Dimethylquercetin                        | Flavonoids | Flavonols     |
| 86. | 16.03  | 288.0654 | C <sub>15</sub> H <sub>12</sub> O <sub>6</sub>  | -1.17 | 94.69 | 151.0395,<br>109.0289,<br>83.0133               | Eriodictyol                                  | Flavonoids | Flavanones    |
| 87. | 16.03  | 329.0655 | C <sub>16</sub> H <sub>14</sub> O <sub>6</sub>  | -1.3  | 94.93 | 243.0293,<br>149.0238,<br>107.0133, 91.0183     | Homoeriodictyol                              | Flavonoids | Flavanones    |
| 88. | 16.09  | 254.0563 | C <sub>15</sub> H <sub>10</sub> O <sub>4</sub>  | 0.25  | 99.09 | 534.0665,<br>508.1121,<br>254.0539              | 7,4'-Dihydroxyflavone                        | Flavonoids | Flavones      |
| 89. | 16.09  | 563.1155 | C <sub>29</sub> H <sub>24</sub> O <sub>12</sub> | -3.9  | 82.77 | 517.0770,<br>129.0551                           | Theaflavin                                   | Flavonoids | Flavanols     |
| 90. | 16.64  | 315.0511 | C <sub>16</sub> H <sub>12</sub> O <sub>7</sub>  | 0.07  | 86.81 | 299.0442,<br>271.9578,<br>216.9417,<br>189.0253 | Isorhamnetin                                 | Flavonoids | Flavonols     |
| 91. | 16.076 | 621.1091 | C <sub>27</sub> H <sub>25</sub> O <sub>17</sub> | 0.59  | 89.09 | 109.0284,<br>135.0076                           | Cyanidin 3-O-(3'',6''-O-dimalonyl-glucoside) | Flavonoids | Anthocyanins  |
| 92. | 16.793 | 463.1240 | C <sub>22</sub> H <sub>23</sub> O <sub>11</sub> | -4.95 | 84.57 | 121.0284,<br>145.0495                           | Isopeonidin 3-O-galactoside                  | Flavonoids | Anthocyanins  |



|     |        |           |                                                 |       |       |                                                 |                                                    |                       |                              |
|-----|--------|-----------|-------------------------------------------------|-------|-------|-------------------------------------------------|----------------------------------------------------|-----------------------|------------------------------|
| 93. | 16.823 | 313.0772  | C <sub>17</sub> H <sub>14</sub> O <sub>6</sub>  | 0.01  | 73.75 | 313.0712,<br>243.0293,<br>173.0238, 67.0183     | <i>Cirsimaritin</i>                                | <i>Flavonoids</i>     | <i>Flavones</i>              |
| 94. | 18.722 | 356.3246  | C <sub>16</sub> H <sub>20</sub> O <sub>9</sub>  | 0.37  | 98.01 | 175.0395,<br>163.0395,<br>161.0238              | <i>1-O-feruloyl-beta-D-glucose</i>                 | <i>Phenolic acids</i> | <i>Hydroxycinnamic acids</i> |
| 95. | 20.106 | 496.1217  | C <sub>22</sub> H <sub>24</sub> O <sub>12</sub> | 0.71  | 89.87 | 289.0717,<br>181.0506                           | <i>4'-O-Methyl(-)-epicatechin 3'-O-glucuronide</i> | <i>Flavonoids</i>     | <i>Flavanols</i>             |
| 96. | 20.722 | 353.1427  | C <sub>21</sub> H <sub>22</sub> O <sub>5</sub>  | 3.25  | 81.6  | 353.1438,<br>233.0848                           | <i>Isoxanthohumol</i>                              | <i>Flavonoids</i>     | <i>Flavanones</i>            |
| 97. | 20.943 | 610.15338 | C <sub>27</sub> H <sub>30</sub> O <sub>16</sub> | -8.26 | 87.19 | 101.0238,<br>119.0344                           | <i>Cyanidin 3-O-sophoroside</i>                    | <i>Flavonoids</i>     | <i>Anthocyanins</i>          |
| 98. | 22.027 | 627.1561  | C <sub>27</sub> H <sub>31</sub> O <sub>17</sub> | 0.26  | 89.87 | 89.0238, 161.0449                               | <i>Delphinidin 3,5-O-diglucoside</i>               | <i>Flavonoids</i>     | <i>Anthocyanins</i>          |
| 99. | 22.274 | 338.1008  | C <sub>16</sub> H <sub>18</sub> O <sub>8</sub>  | 1.51  | 88.6  | 221.2218,<br>191.0575,<br>163.0392,<br>119.0504 | <i>p-Coumaroylquinic acid</i>                      | <i>Phenolic acids</i> | <i>Hydroxycinnamic acids</i> |

**Table S3.** ADME properties of the abundant red rice phenolic metabolites.

| Molecule                                        | MW<br>(< 500 Da) | Lipinski's rule   |                           |                             | Water solubility (ESOL) |                    | GI absorption | Bioavailability<br>Score |
|-------------------------------------------------|------------------|-------------------|---------------------------|-----------------------------|-------------------------|--------------------|---------------|--------------------------|
|                                                 |                  | LOG<br>P<br>(< 5) | H-bond<br>donors<br>(< 5) | H-bond acceptors<br>(< 10 ) | Log S                   | Class              |               |                          |
| 1-O-feruloyl- $\beta$ -D-glucose                | 356.32           | 1.68              | 5                         | 9                           | -1.64                   | Very soluble       | Low           | 0.55                     |
| 3',4',7-Trihydroxyisoflavone                    | 362.32           | 2.65              | 1                         | 8                           | -4.28                   | Moderately soluble | High          | 0.55                     |
| 3-methylcatechol                                | 124.14           | 0.98              | 2                         | 2                           | -2.25                   | Soluble            | High          | 0.55                     |
| 3'-O-Methylviolanone                            | 330.33           | 2.79              | 1                         | 6                           | -3.65                   | Soluble            | High          | 0.55                     |
| 4-Hydroxybenzaldehyde                           | 122.12           | 0.99              | 1                         | 2                           | -1.87                   | Very soluble       | High          | 0.55                     |
| 4'-Methyl-epigallocatechin 3'-<br>O-glucuronide | 496.42           | 1.08              | 8                         | 13                          | -2.73                   | Soluble            | Low           | 0.11                     |
| 4'-O-Methyl(-)-epicatechin 3'-<br>O-glucuronide | 480.42           | 1.04              | 7                         | 12                          | -2.87                   | Soluble            | Low           | 0.11                     |
| Apigenin 6-C-glucoside                          | 432.38           | 1.94              | 7                         | 10                          | -2.84                   | Soluble            | Low           | 0.55                     |
| Benzoic acid                                    | 122.12           | 1.11              | 1                         | 2                           | -2.2                    | Soluble            | High          | 0.85                     |
| Catechin                                        | 290.27           | 1.47              | 5                         | 6                           | -2.22                   | Soluble            | High          | 0.55                     |
| Cirsimaritin                                    | 314.29           | 2.56              | 2                         | 6                           | -4.2                    | Moderately soluble | High          | 0.55                     |
| Dihydroquercetin                                | 304.25           | 1.3               | 5                         | 7                           | -2.66                   | Soluble            | High          | 0.55                     |
| Hesperidin                                      | 610.56           | 2.6               | 8                         | 15                          | -3.28                   | Soluble            | Low           | 0.17                     |
| Isoquercetin                                    | 464.38           | 2.11              | 8                         | 12                          | -3.04                   | Soluble            | Low           | 0.17                     |
| Isorhamnetin                                    | 316.26           | 2.35              | 4                         | 7                           | -3.36                   | Soluble            | High          | 0.55                     |
| Isorhamnetin 3-O-glucoside 7-<br>O-rhamnoside   | 624.54           | 3.7               | 9                         | 16                          | -3.73                   | Soluble            | Low           | 0.17                     |
| Isoxanthohumol                                  | 354.4            | 3.06              | 2                         | 5                           | -4.69                   | Moderately soluble | High          | 0.55                     |
| Mellein                                         | 178.18           | 1.96              | 1                         | 3                           | -2.82                   | Soluble            | Low           | 0.11                     |
| Naringin 4'-glucoside                           | 742.68           | 4.21              | 11                        | 19                          | -2.61                   | Soluble            | Low           | 0.17                     |
| Sinensetin                                      | 372.37           | 3.66              | 0                         | 7                           | -4.4                    | Moderately soluble | High          | 0.55                     |
